# Supplementary material for: Clay Nanotubes Loaded with Diazepam or Xylazine Permeate the Brain through Intranasal Administration in Mice
Source: Int J Mol Sci. 2023 Jun 2;24(11):9648. doi: 10.3390/ijms24119648 (PMC10253593; doi:10.3390/ijms24119648)

**Supplemental Figures for**

## **Clay Nanotubes Loaded with Diazepam or Xylazine Permeate the Brain through Intranasal Administration in Mice**

**Yaswanthi Yanamadala <sup>1, †</sup>, Mahdi Y. Saleh <sup>2, †</sup>, Afrika A. Williams <sup>1</sup> and Yuri Lvov <sup>2, \*</sup>, Teresa A. Murray <sup>1, \*</sup>**

<sup>1</sup> Center for Biomedical Engineering and Rehabilitation Sciences, Louisiana Tech University, Ruston, LA 71270, USA; yashwanthi789@gmail.com (Y.Y.); afrika.williams@gmail.com (A.A.W.)

<sup>2</sup> Institute for Micromanufacturing, Louisiana Tech University, Ruston, LA 71270, USA; mahdisaleh95@gmail.com

\* Correspondence: ylvov@latech.edu (Y.L.); tmurray@latech.edu (T.A.M.); Tel. : +1- (602)-692-3951

† These authors contributed equally to this work.

**Figure S1.** Representative images from mice sacrificed four hours after treatment with 3 mg/mL of HNT/RITC via intraperitoneal delivery. DAPI-stained nuclei (A, blue) and HNT/RITC (B, orange) in the same slice. Scale bar is 200  $\mu$ m.

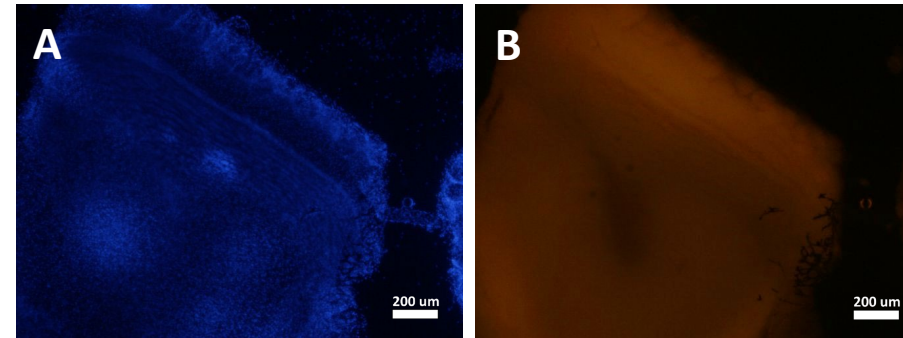

**Figure S2.** Representative images of the olfactory bulb from mice sacrificed at 4, 12, 24, and 48 hours after treatment with 3 mg/mL of HNT/RITC via intranasal (IN) delivery. DAPI-stained nuclei (left column, blue) and HNT/RITC (right column, orange) in the same slice. Scale bar is 200  $\mu\text{m}$  for A-D and 100  $\mu\text{m}$  for E-H.

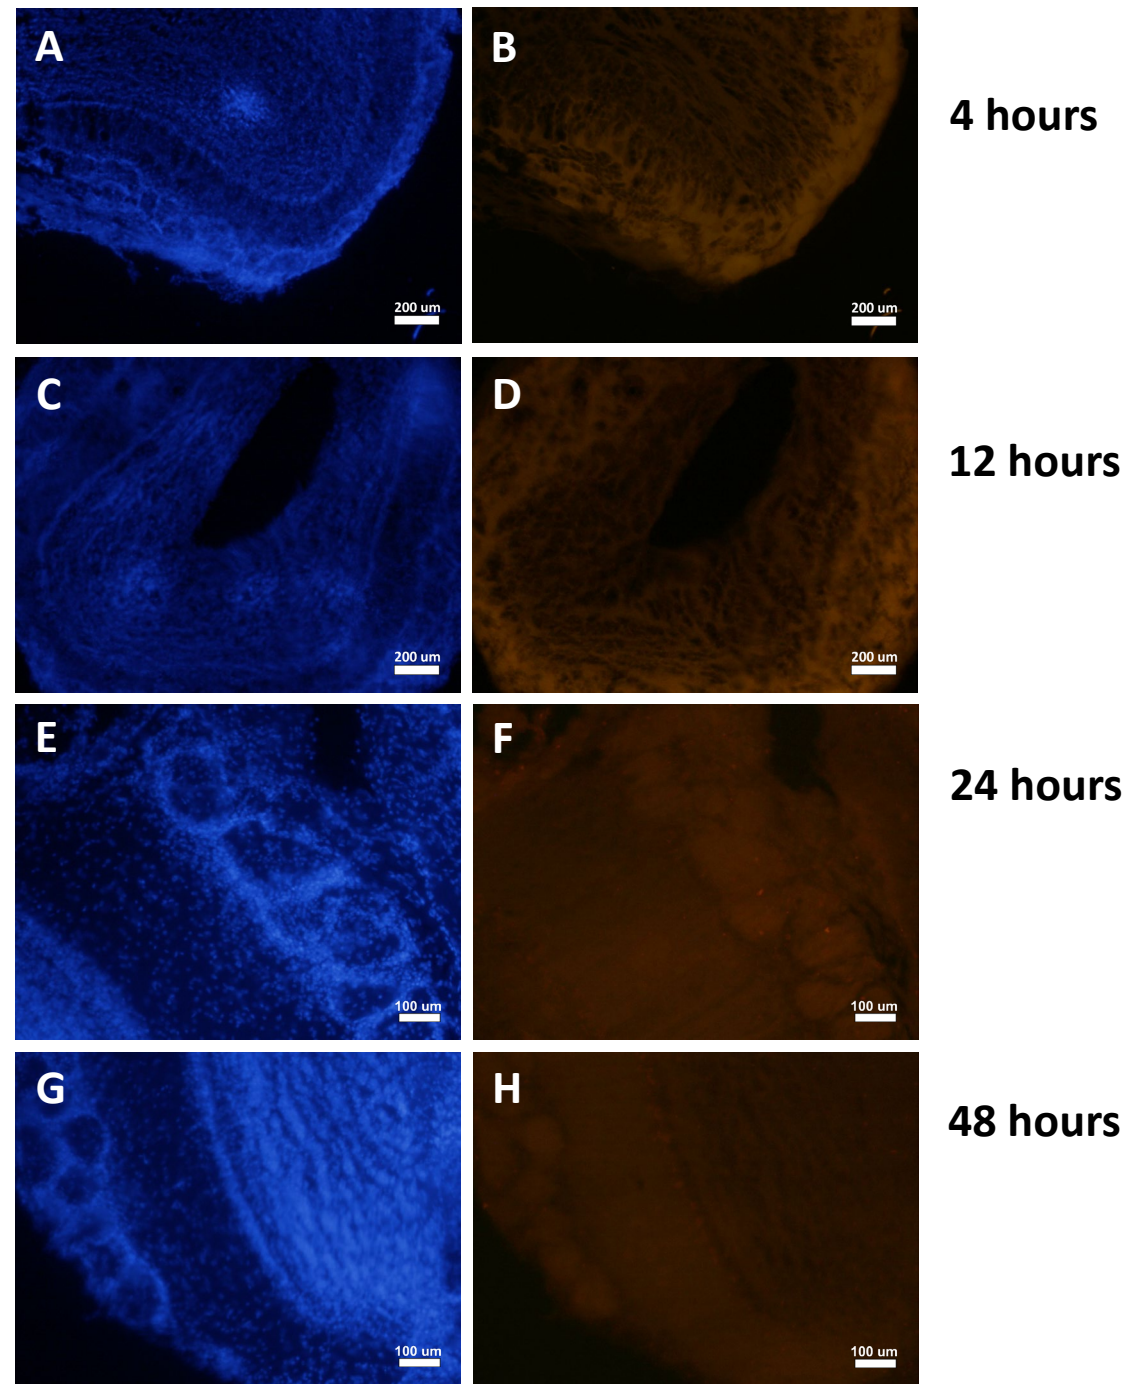

**Figure S3.** Representative images of the cortex from mice sacrificed at 4, 12, 24, and 48 hours after treatment with 3 mg/mL of HNT/RITC via IN delivery. DAPI-stained nuclei (left column, blue) and HNT/RITC (right column, orange) in the same slice. Scale bar is 200  $\mu\text{m}$  for A-D and 100  $\mu\text{m}$  for E-H.

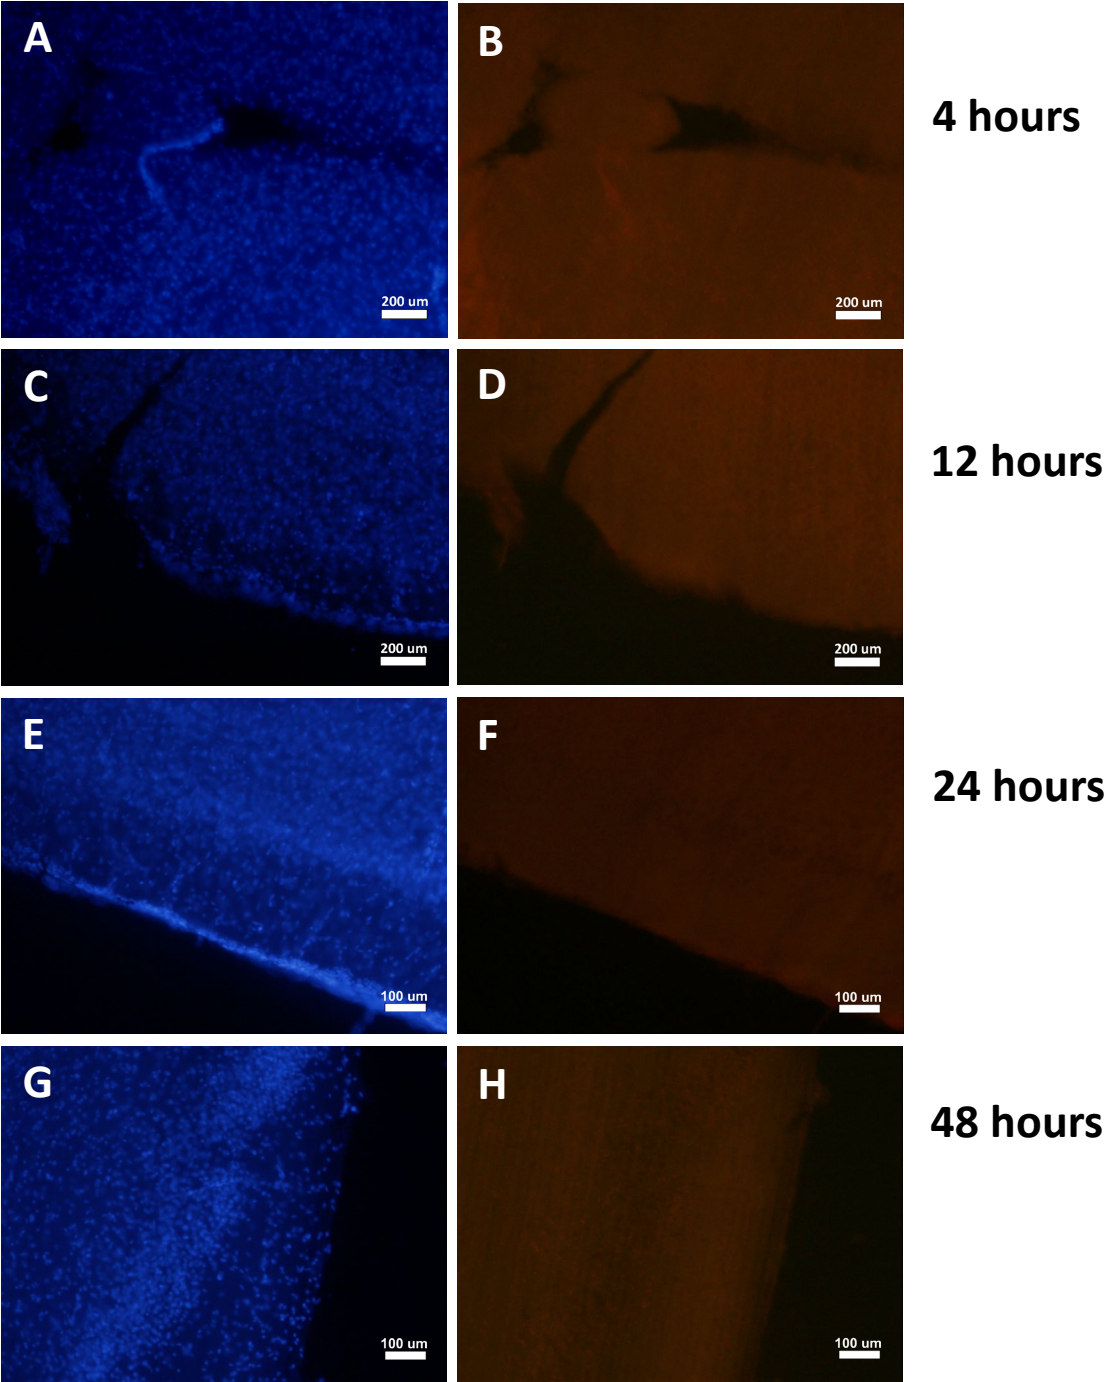

**Figure S4.** Representative images of the olfactory bulb (A-B) and the cortex (C-D) from mice sacrificed at 72 hours after treatment with 3 mg/mL of HNT/RITC via IN delivery. DAPI-stained nuclei (left column, blue) and HNT/RITC (right column, orange) in the same slice. No fluorescence from RITC was observed. Scale bar is 200  $\mu\text{m}$  for A-B and 100  $\mu\text{m}$  for C-D.

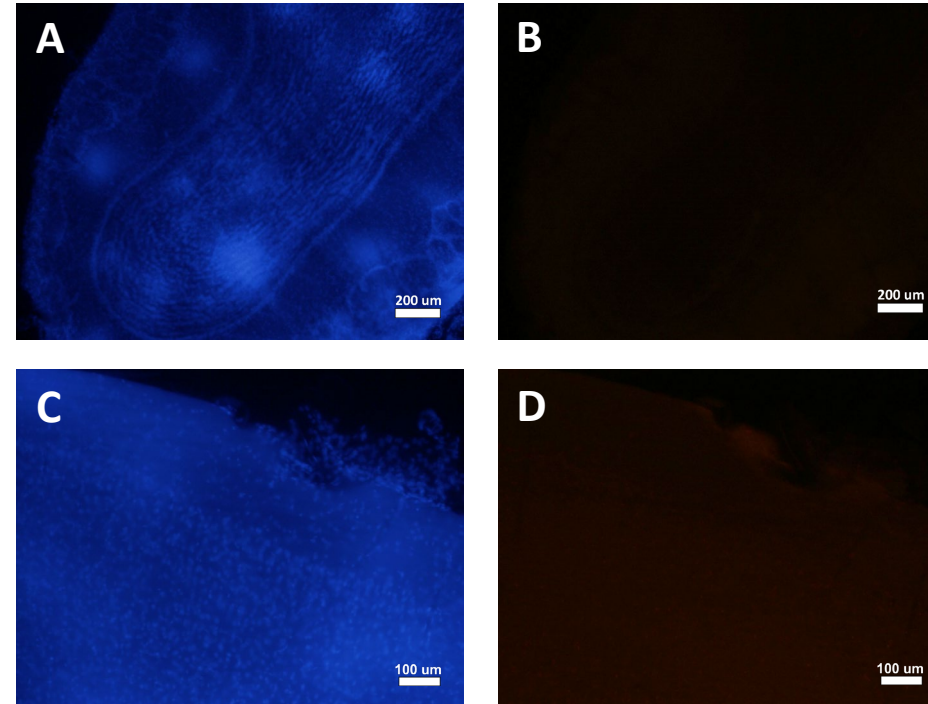

Supplement: Supplementary file 1 [file ijms-24-09648-s001.zip › ijms-2404918-supplementary.pdf]
